# Supplementary material for: Morita therapy for depression and anxiety (Morita Trial): study protocol for a pilot randomised controlled trial
Source: Springer Nature journal article supplement (doi:10.1186/s13063-016-1279-3), 2016-03-23

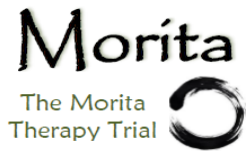

**‘Permission for Researcher to Contact’ Form**

**The Morita Trial (Morita Therapy for Depression and Anxiety:  
A Feasibility and Pilot Study)**

I confirm that I have read and understand the summary sheet for the above study and I am happy for a researcher to contact me to discuss whether or not I would like to take part. I understand that my participation is voluntary and that I am free to withdraw at any time without giving any reason, without my medical care or legal rights being affected.

Name.....  
(Please print name)

Address.....  
.....  
.....

Signature.....

Name of GP and Surgery:

**Telephone contact details:**

Day..... May we leave a voice mail message? Y / N

Evening..... May we leave a voice mail message? Y / N

Mobile..... May we leave a voice mail message? Y / N

Email address.....

**Please return to:**

Holly Sugg, Morita Trial Study Researcher  
University of Exeter Medical School  
Room 1.33, South Cloisters  
St Luke's Campus  
Heavitree Road  
Exeter EX1 2LU

Email: [h.v.s.sugg@exeter.ac.uk](mailto:h.v.s.sugg@exeter.ac.uk)

Office telephone: 01392 727412

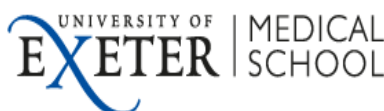

Supplement: MOESM2 [file 9783174]
